# Supplementary material for: Utilization of defined microbial communities enables effective evaluation of meta-genomic assemblies
Source: PubMed Central journal article supplement (PMC5390407; doi:10.1186/s12864-017-3679-5), 2017-04-13

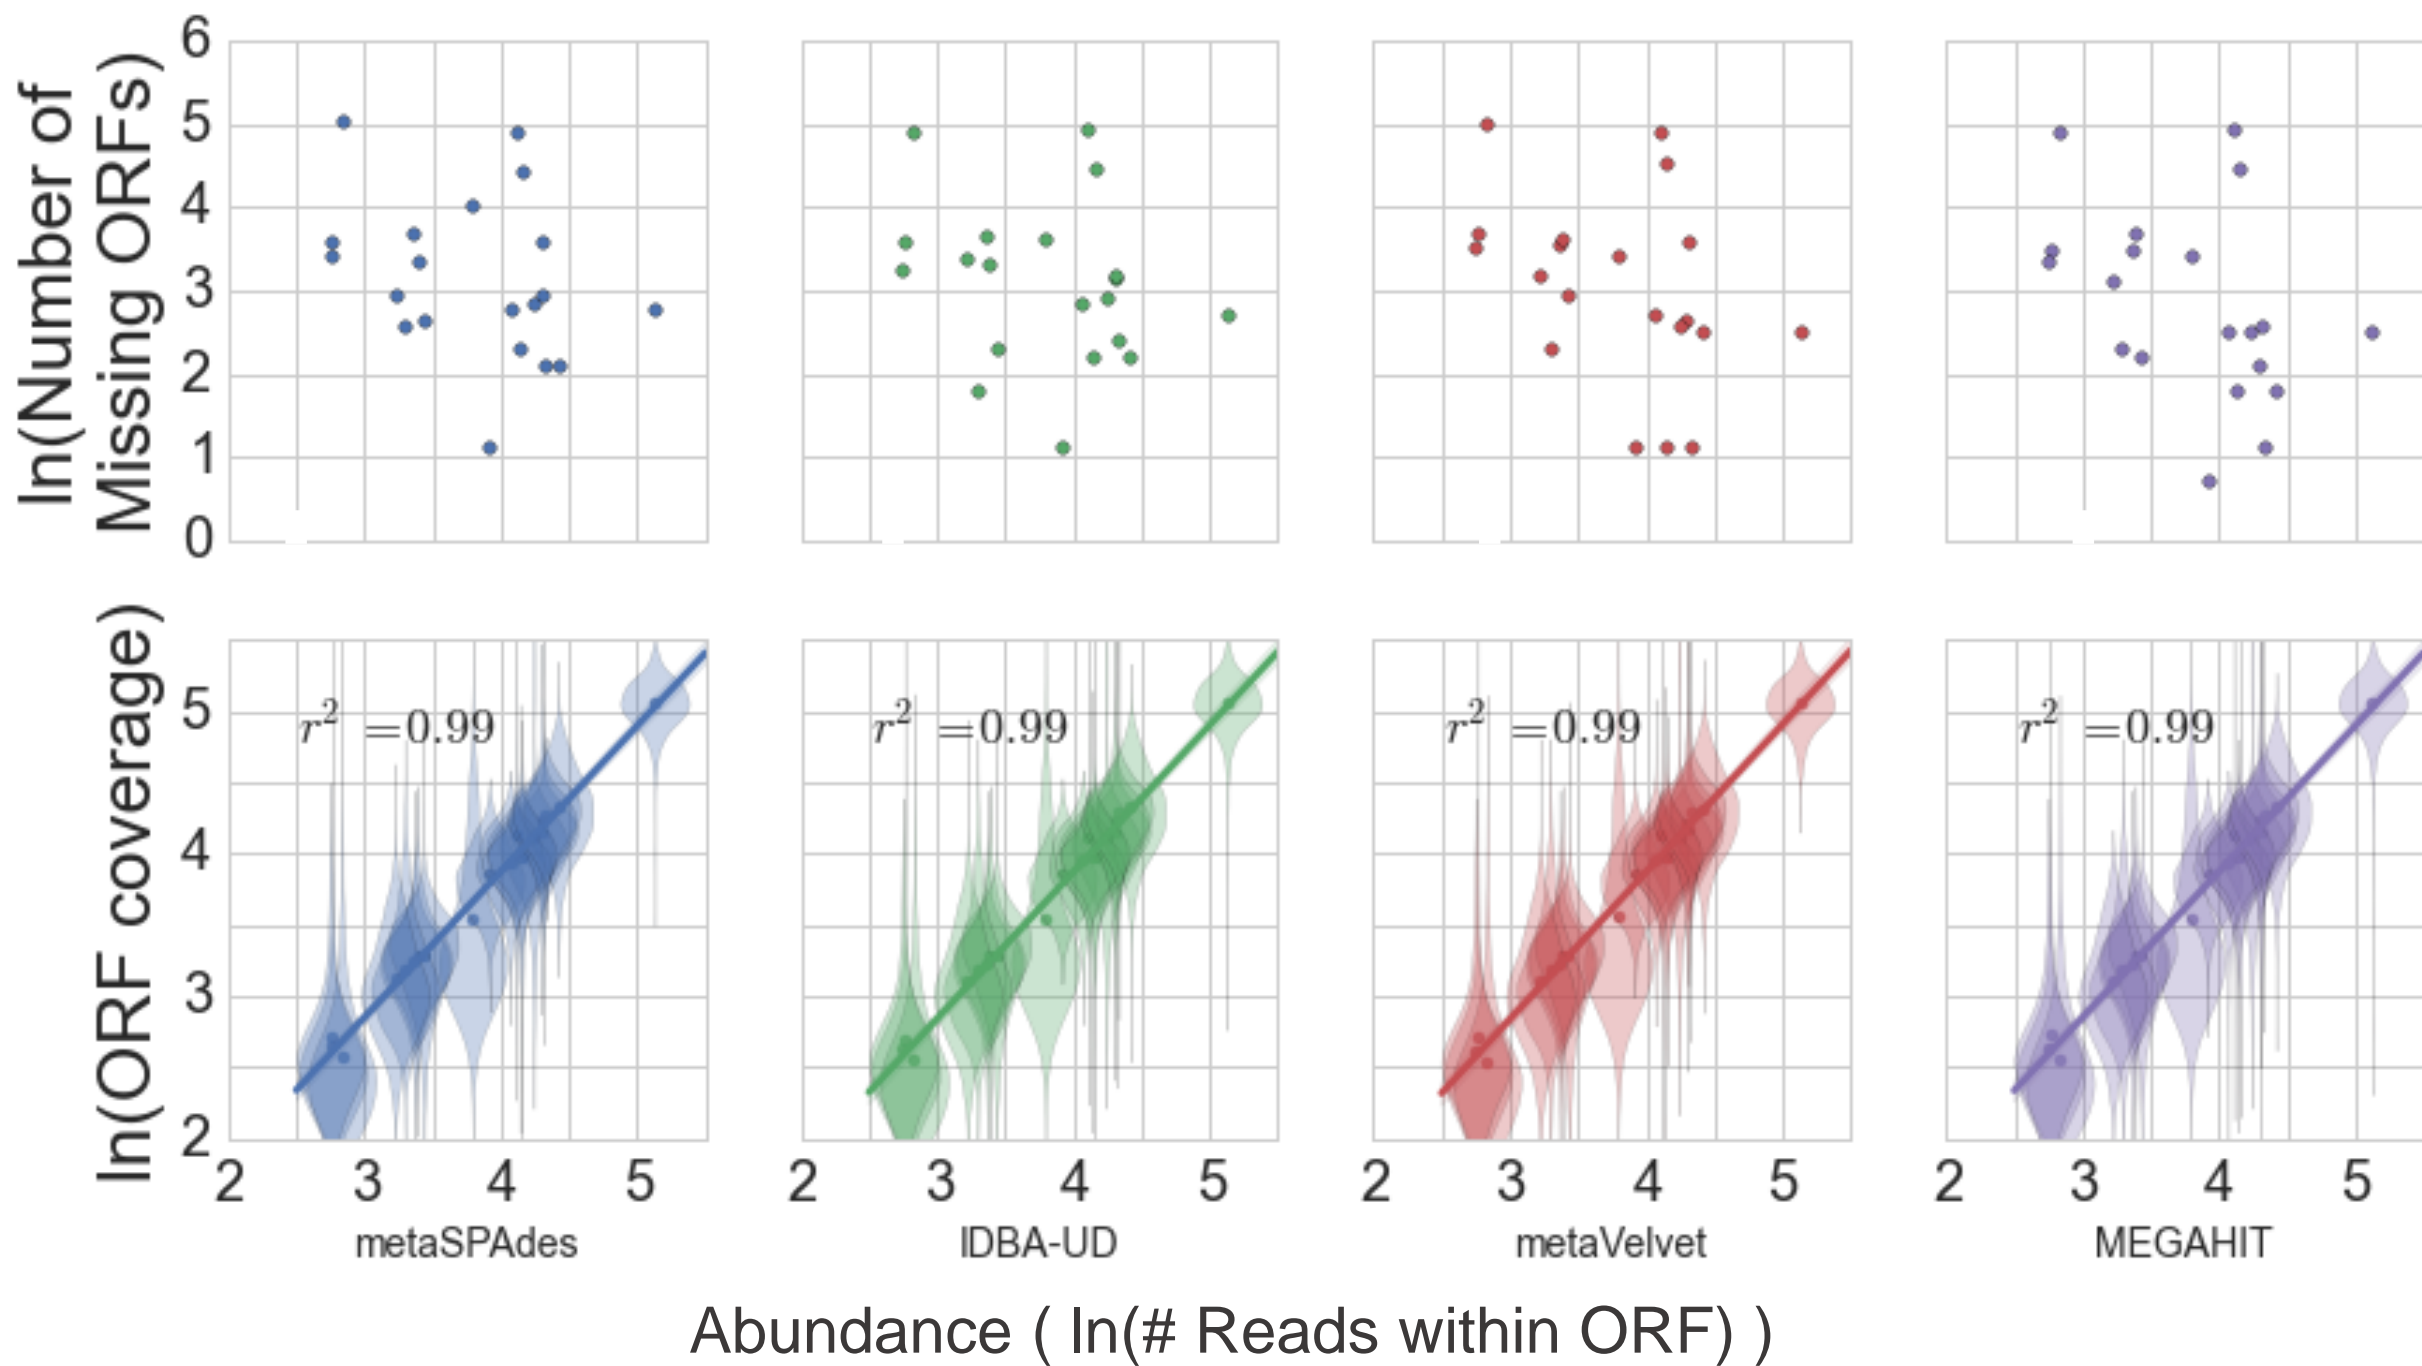

Supplement: 12864_2017_3679_MOESM2_ESM.pdf [file 12864_2017_3679_MOESM2_ESM.pdf]
